# Supplementary material for: Anti-Inflammatory Effect of Chamaecyparis obtusa (Siebold & Zucc.) Endl. Leaf Essential Oil
Source: MDPI journal article supplement (doi:10.3390/molecules29051117), 2024-03-01
Supplement: s1 [file s1]

# Anti-Inflammatory Effect of *Chamaecyparis obtusa* (Siebold & Zucc.) Endl. Leaf Essential Oil

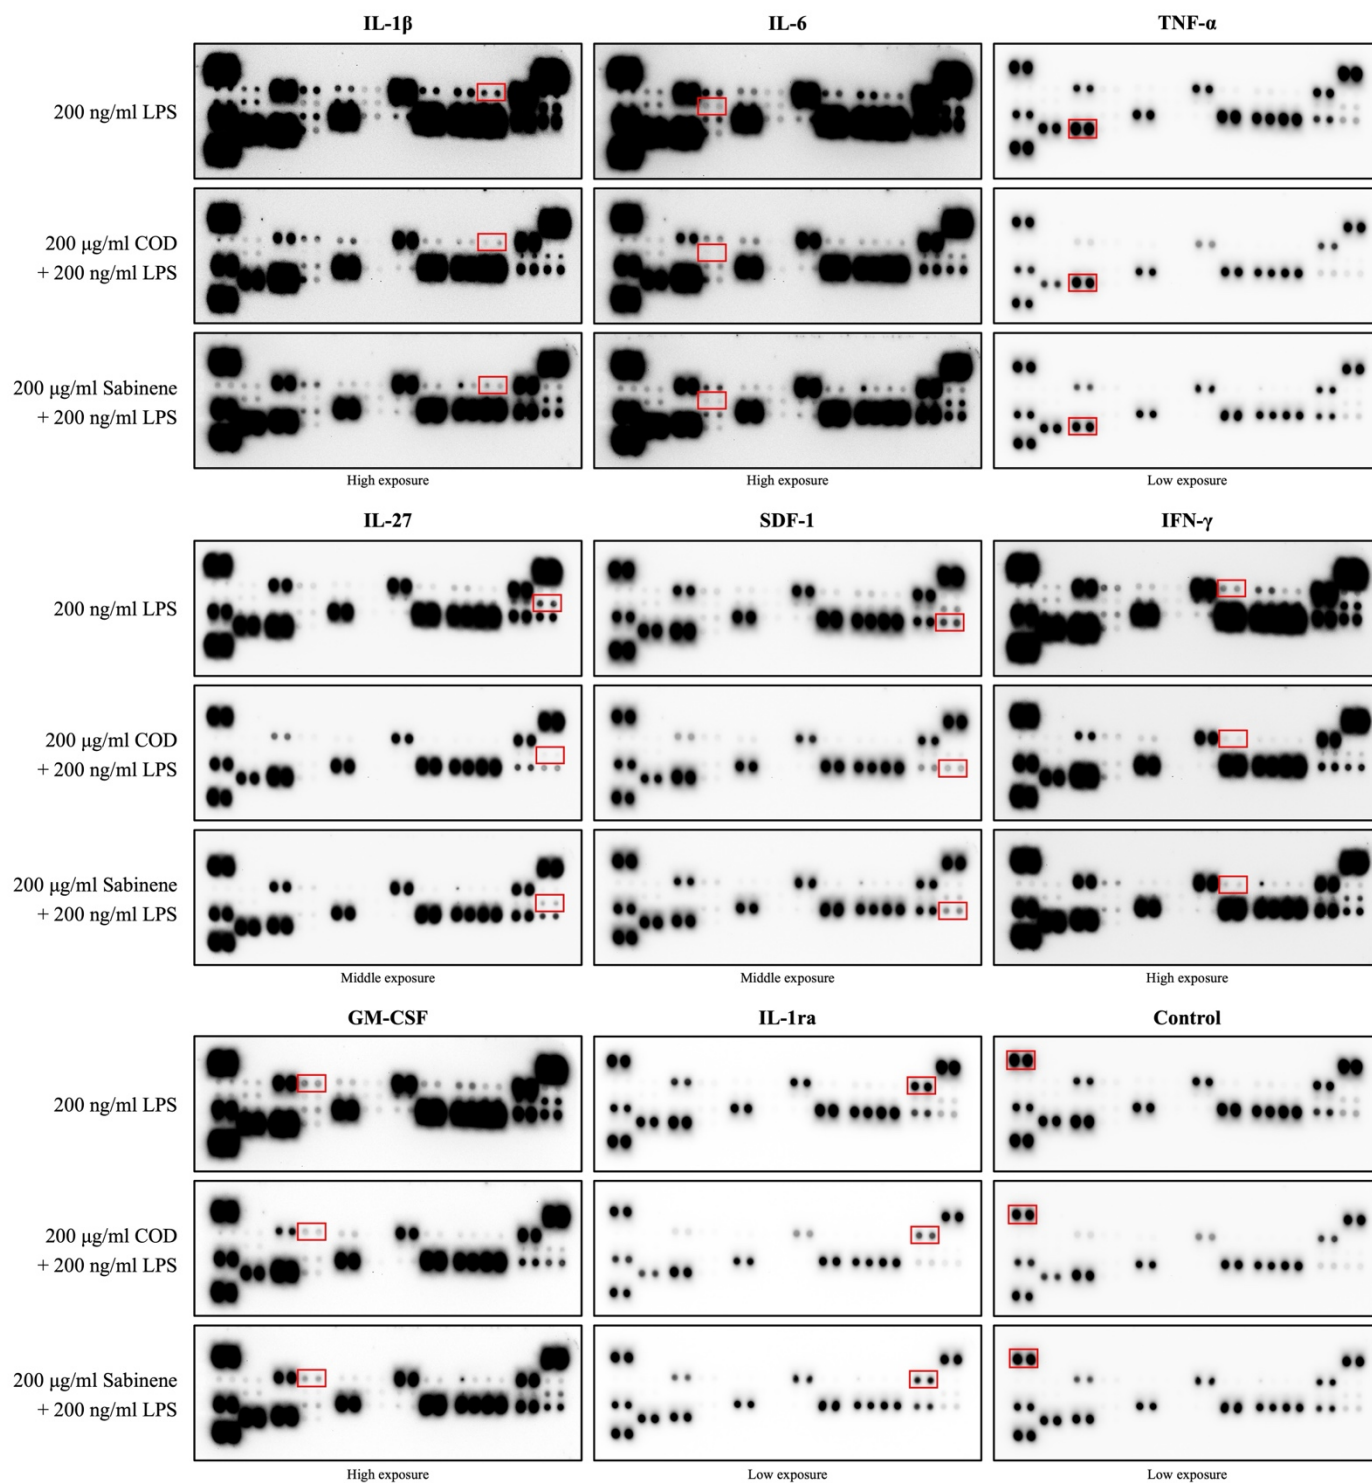

**Supplement Figure S1.** Cytokine array blots sorted by exposure time. Cytokine array blots were probed with the culture supernatants, untreated or 200 µg/ml COD or 200 µg/ml sabinene. The red squares represent Figure 6b.

**Supplement Table S1.** Reagents used in this study.

| Reagent                                                            | Catalog no. | Company                                                |
|--------------------------------------------------------------------|-------------|--------------------------------------------------------|
| BlasTaq™ 2X qPCR Master Mix                                        | G891        | Applied Biological Materials (Richmond, Canada)        |
| Skim Milk                                                          | 232100      | BD Difco (Sparks, MD, USA)                             |
| Nutrient Agar (NA)                                                 | 213000      |                                                        |
| Nutrient Broth (NB)                                                | 234000      |                                                        |
| Tryptic Soy Agar (TSA)                                             | 236950      |                                                        |
| Tryptic Soy Broth (TSB)                                            | 211825      |                                                        |
| Clarity™ Western ECL Substrate                                     | #1705060    | Bio-Rad Laboratory (Hercules, CA, USA)                 |
| Protein Assay Dye Reagent Concentrate                              | #5000006    |                                                        |
| Bovine Serum Albumin                                               | BSAS 0.1    | Bovogen (Keilor East, VIC, Australia)                  |
| Dulbecco's Modified Eagle's Medium (DM EM)                         | DMEM-HPA    | Capricorn Scientific GmbH<br>(Ebsdorfergrund, Germany) |
| Fetal Bovine Serum (FBS)                                           | FBS-22A     |                                                        |
| Penicillin/Streptomycin (100X)                                     | PS-B        |                                                        |
| Amersham™ Protran™ 0.45 NC Membrane                                | 10600002    | Cytiva Amersham (Buckinghamshire, UK)                  |
| 3-(4,5-Dimethylthiazol-2-yl)-2,5-Diphenyltetrazolium Bromide (MTT) | M1415       | Duchefa Biochemie (Haarlem, Netherlands)               |
| Sabinene                                                           | PHL82342    | PhytoLab (Vestenbergsgreuth, Germany)                  |
| Mouse Cytokine Array Panel kit                                     | ARY006      | R&D Systems (Minneapolis, MN, USA)                     |
| Griess reagent                                                     | G4410       | Sigma Aldrich (St.Louis, MO, USA)                      |
| Lipopolysaccharide (LPS)                                           | L3012       |                                                        |
| Triton® X-100                                                      | 9002-93-1   |                                                        |
| RNAiso Plus                                                        | 9109        | Takara (Shiga, Japan)                                  |
| ReverTra Ace™ qPCR RT Master Mix with gDNA Remover                 | FSQ-301     | Toyobo (Osaka, Japan)                                  |

**Supplement Table S2.** Antibodies used in this study.

| Antibody                      | Catalog no. | Company                                         |
|-------------------------------|-------------|-------------------------------------------------|
| Phospho-p44/42 MAPK (Erk1/2)  | #9101       | Cell Signaling Technology<br>(Danvers, MA, USA) |
| p44/42 MAPK (Erk1/2)          | #4695       |                                                 |
| Phospho-SAPK/JNK              | #9251       |                                                 |
| SAPK/JNK                      | #9252       |                                                 |
| Phospho-p38 MAPK              | #9211       |                                                 |
| p38 MAPK                      | #9212       |                                                 |
| Phospho-NF- $\kappa$ B p65    | #3033       |                                                 |
| Phospho-I $\kappa$ B $\alpha$ | #2859       |                                                 |
| I $\kappa$ B $\alpha$         | #4814       |                                                 |
| Phospho-JAK1                  | #3331       |                                                 |
| JAK1                          | #3332       |                                                 |
| Phospho-STAT1                 | #9167       |                                                 |
| STAT1                         | #9172       |                                                 |
| Phospho-STAT3                 | #9145       |                                                 |
| STAT3                         | #30835      |                                                 |
| iNOS                          | PA1-036     | Invitrogen (Carlsbad, CA, USA)                  |
| NF $\kappa$ B p65             | sc-8008     | Santa Cruz Biotechnology<br>(Carlsbad, CA, USA) |
| $\beta$ -actin                | sc-47778    |                                                 |
| HRP, Goat Anti-Mouse IgG      | A21010      | Abbkine (Wuhan, China)                          |
| HRP, Goat Anti-Rabbit IgG     | A21020      |                                                 |

**Supplement Table S3.** Oligonucleotide sequences for the quantitative real-time PCR (RT-qPCR).

| Gene name                               |         | Sequence ( 5' $\rightarrow$ 3' ) |
|-----------------------------------------|---------|----------------------------------|
| <i>iNOS</i> (mouse)                     | Forward | CAGCACAGGAAATGTTTCAGC            |
|                                         | Reverse | TAGCCAGCGTACCGGATGA              |
| <i>TNF-<math>\alpha</math></i> (mouse)  | Forward | TATGGCTCAGGGTCCAACCTC            |
|                                         | Reverse | CTCCCTTTGCAGAACTCAGG             |
| <i>IL-1<math>\beta</math></i> (mouse)   | Forward | TTGACGGACCCCAAAAGATG             |
|                                         | Reverse | AGAAGGTGCTCATGTCCTCA             |
| <i>IL-6</i> (mouse)                     | Forward | GGTGACAACCACGGCCTTCCC            |
|                                         | Reverse | AAGCCTCCGACTTGTGAAGTGGT          |
| <i><math>\beta</math>-actin</i> (mouse) | Forward | TGTCCACCTTCCAGCAGATGT            |
|                                         | Reverse | AGCTCAGTAACAGTCCGCCTAGA          |
